# Supplementary material for: Three-dimensional TiNb2O7 anchored on carbon nanofiber core–shell arrays as an anode for high-rate lithium ion storage
Source: Royal Society of Chemistry journal article supplement (doi:10.1039/c9ra10485b), 2020-01-01
Supplement: c9ra10485b1.pdf [file c9ra10485b1.pdf]

## Supporting Information

### **Three-Dimensional TiNb<sub>2</sub>O<sub>7</sub> anchored on Carbon Nanofibers core-shell Arrays as Anode for High-Rate Lithium Ion Storage**

Meili Qi<sup>a</sup>, Dongliang Chao<sup>b</sup>, Weifeng Sun<sup>a</sup>, Jinghua Yin<sup>a</sup>, Minghua Chen<sup>a\*</sup>

<sup>a</sup> *Key Laboratory of Engineering Dielectric and Applications (Ministry of Education), School of Materials Science and Engineering, Harbin University of Science and Technology, Harbin 150080, P. R. China*

<sup>b</sup> *School of Materials Science and Engineering, Nanyang Technological University, Singapore, 637553*

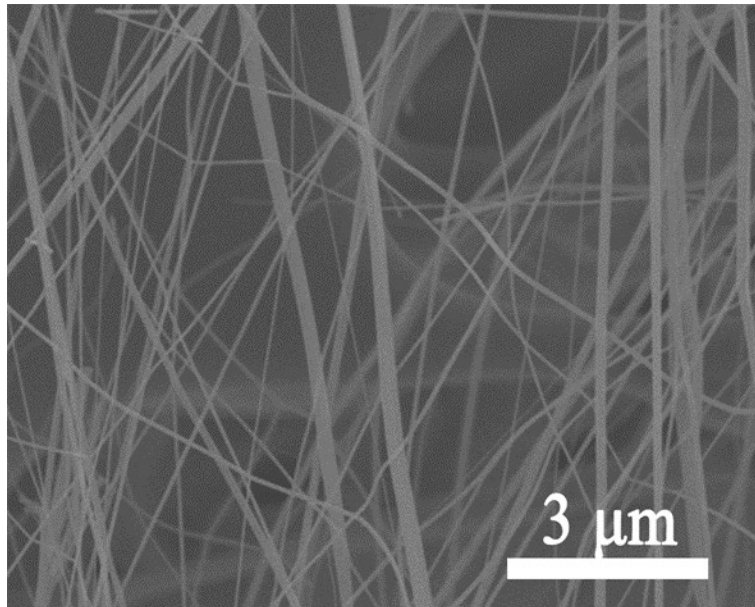

**Supplemental Figure S1.** SEM images of CNFs arrays

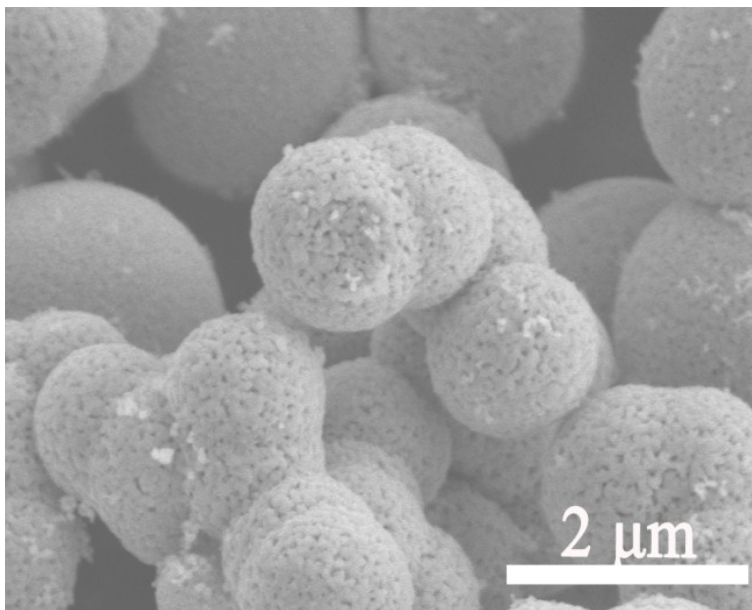

**Supplemental Figure S2.** SEM images of TNO microsphere

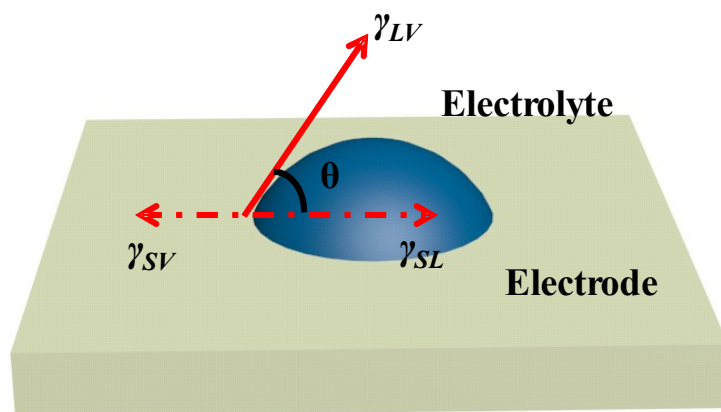

**Supplemental Figure S3.** A schematic representation showing thermodynamic surface tensions

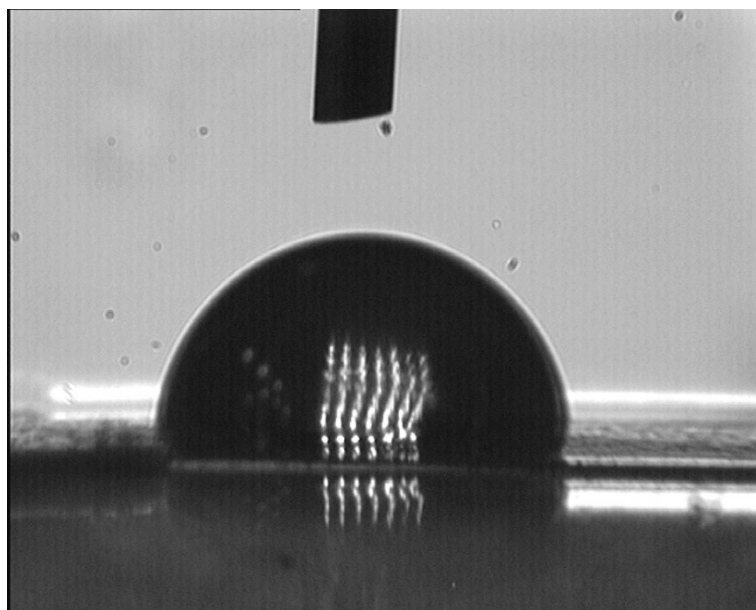

**Supplemental Figure S4.** Contact angle images between liquid electrolyte and Freestanding CNFs

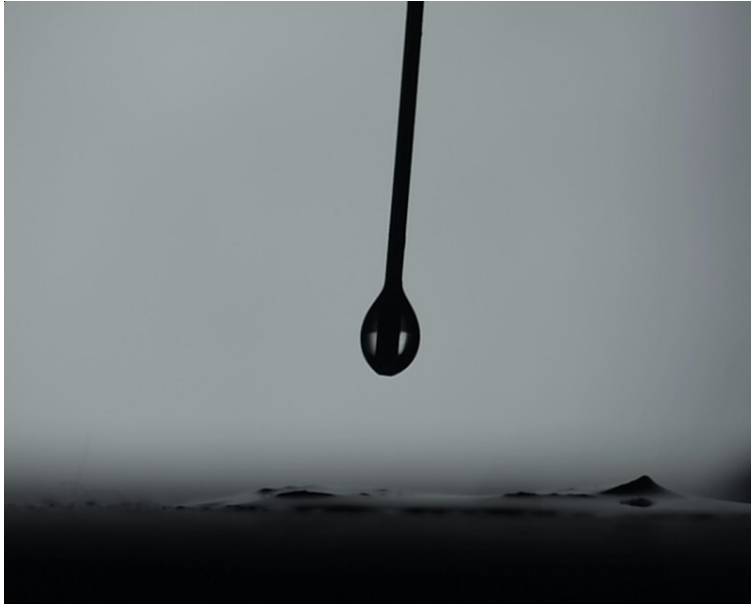

***Supplemental Figure S5.*** Contact angle images between liquid electrolyte and Freestanding TNO/CNFs core/shell arrays
